# Supplementary material for: Comparative Gene-Expression Analysis of Alzheimer’s Disease Progression with Aging in Transgenic Mouse Model
Source: MDPI journal article supplement (doi:10.3390/ijms20051219), 2019-03-11
Supplement: s1 [file s1]

| GENES     | 6 MONTH         |                  | 9 MONTH         |                  | 12 MONTH        |                  |
|-----------|-----------------|------------------|-----------------|------------------|-----------------|------------------|
|           | Over expression | Under expression | Over expression | Under expression | Over expression | Under expression |
| ABAD      | •               |                  | •               |                  | •               |                  |
| ADAM10    |                 | •                |                 | •                |                 | •                |
| APH1B     |                 | •                |                 | •                |                 | •                |
| APOE      |                 | •                |                 | •                |                 | •                |
| APP       | •               |                  | •               |                  | •               |                  |
| APPBP1    | •               |                  | •               |                  | •               |                  |
| ATF6      |                 | •                |                 | •                |                 | •                |
| BACE1     |                 |                  |                 | •                |                 | •                |
| BAD       |                 |                  | •               |                  |                 |                  |
| BID       |                 |                  | •               |                  | •               |                  |
| CALM1     |                 | •                |                 | •                |                 | •                |
| CALN      | •               |                  | •               |                  | •               |                  |
| CASP12    |                 | •                |                 |                  | •               |                  |
| CASP3     | •               |                  | •               |                  |                 |                  |
| CASP7     | •               |                  | •               |                  | •               |                  |
| CASP8     | •               |                  | •               |                  | •               |                  |
| CASP9     | •               |                  | •               |                  | •               |                  |
| CDK5      | •               |                  | •               |                  |                 | •                |
| CXI       |                 |                  |                 |                  |                 |                  |
| CXII      |                 |                  |                 | •                |                 |                  |
| CXIII     | •               |                  |                 |                  | •               |                  |
| CXV       |                 |                  |                 | •                |                 | •                |
| CXVI      |                 | •                |                 | •                |                 | •                |
| CYCS      | •               |                  | •               |                  | •               |                  |
| ERK/MAPK2 |                 | •                | •               |                  | •               |                  |
| FAS       | •               |                  | •               |                  |                 |                  |
| GQ        |                 |                  |                 | •                |                 | •                |
| GSK3B     | •               |                  | •               |                  | •               |                  |
| IDE       |                 | •                | •               |                  | •               |                  |
| IL1B      |                 | •                | •               |                  | •               |                  |
| IP3R      | •               |                  | •               |                  | •               |                  |
| IRE1A     | •               |                  | •               |                  | •               |                  |
| LPL       |                 |                  | •               |                  | •               |                  |
| LRP1      | •               |                  |                 | •                |                 | •                |
| MAPT/TAU  | •               |                  | •               |                  | •               |                  |
| NEP/MME   |                 | •                |                 | •                |                 | •                |
| NMDAR     | •               |                  | •               |                  | •               |                  |
| NOS1      |                 | •                | •               |                  | •               |                  |
| P25       |                 |                  |                 |                  | •               |                  |

|               |   |   |   |  |   |   |   |
|---------------|---|---|---|--|---|---|---|
| <i>PEN-2</i>  |   |   | • |  |   |   |   |
| <i>PERK</i>   |   |   |   |  | • | • | • |
| <i>PLCB1</i>  |   |   | • |  |   | • |   |
| <i>PSEN1</i>  |   |   |   |  | • |   | • |
| <i>RYR3</i>   | • |   | • |  |   | • |   |
| <i>SERCA1</i> | • |   |   |  |   |   | • |
| <i>SNCA 1</i> |   | • |   |  | • |   | • |
| <i>TNF</i>    | • |   | • |  |   | • |   |
| <i>VDCC</i>   |   | • | • |  |   | • |   |

**Table S 1:** Genes up regulated or down regulated with age progression

| Gene Symbol   | Function                                                                            | Description                                                                                                                                    |
|---------------|-------------------------------------------------------------------------------------|------------------------------------------------------------------------------------------------------------------------------------------------|
| <i>ADAM10</i> | Signal transduction , Metallopeptidase.                                             | A disintegrin and metallopeptidase domain 10                                                                                                   |
| <i>ABAD</i>   | Metabolism (Mitochondria)<br>Amino acid metabolism.                                 | 3-hydroxyacyl-CoA dehydrogenase / 3-hydroxy-2-methylbutyryl-CoA dehydrogenase                                                                  |
| <i>APH1B</i>  | Environmental Information Processing<br>Signal transduction.                        | anterior pharynx defective 1                                                                                                                   |
| <i>Apo-E</i>  | Exosomal protein.                                                                   | apolipoprotein E                                                                                                                               |
| <i>App</i>    | Serotonergic synapse                                                                | amyloid beta A4 protein                                                                                                                        |
| <i>Atf6</i>   | Protein processing in endoplasmic reticulum                                         | cyclic AMP-dependent transcription factor ATF-6 alpha (ER procesing)                                                                           |
| <i>Serca1</i> | Environmental Information Processing Signal transduction ,Calcium signaling pathway | ATPase, Ca <sup>++</sup> transporting, cardiac muscle, fast twitch 1 .Ca <sup>2+</sup> transporting ATPase, sarcoplasmic/endoplasmic reticulum |
| <i>Bace1</i>  | Hydrolase, Acting on peptide bonds                                                  | beta-site APP-cleaving enzyme 1 .                                                                                                              |
| <i>Bad</i>    | Signal transduction Ras,ErbB, VEGF ,cAMP cGMP - PKG ,PI3K-Akt signaling pathway.    | BCL2-associated agonist of cell death                                                                                                          |
| <i>Bid</i>    | Signal transduction, Sphingolipid signaling pathway                                 | BH3 interacting domain death agonist                                                                                                           |

|                      |                                                                                                   |                                                                                |
|----------------------|---------------------------------------------------------------------------------------------------|--------------------------------------------------------------------------------|
| <b><i>Vdcc</i></b>   | Signal transduction MAPK, Calcium,cAMP, cGMP - PKG signaling pathway                              | calcium channel, voltage-dependent, L type, alpha 1C subunit                   |
| <b><i>Calm1</i></b>  | Signal transduction Ras , Rap1 , Calcium , Phosphatidylinositol,cAMP cGMP - PKG signaling pathway | calmodulin 1 (phosphorylase kinase, delta)                                     |
| <b><i>Caln</i></b>   | Signal transduction, MAPK, Wnt, VEGF Calcium, cGMP - PKG signaling pathway                        | protein phosphatase 3, catalytic subunit, alpha isozyme                        |
| <b><i>CASP12</i></b> | Folding, sorting and degradation                                                                  | caspase 12                                                                     |
| <b><i>Casp3</i></b>  | Signal transduction MAPK, TNF signaling pathway                                                   | Caspase 3                                                                      |
| <b><i>Casp7</i></b>  | Signal transduction TNF signaling pathway                                                         | Caspase 7                                                                      |
| <b><i>Casp8</i></b>  | Signal transduction TNF signaling pathway                                                         | Caspase 8                                                                      |
| <b><i>Casp9</i></b>  | Signal transduction, VEGF,PI3K-Akt signaling pathway                                              | Caspase 9                                                                      |
| <b><i>Cdk5</i></b>   | Axon guidance,Transferring phosphorus-containing groups                                           | cyclin-dependent kinase 5                                                      |
| <b><i>P25</i></b>    | Cdk activation                                                                                    | cyclin-dependent kinase 5 activator 1                                          |
| <b><i>CxI</i></b>    | Energy metabolism<br>Oxidative phosphorylation                                                    | NADH dehydrogenase (ubiquinone) 1 subunit C2                                   |
| <b><i>CxII</i></b>   | Carbon metabolism, Carbohydrate metabolism Citrate cycle (TCA cycle)<br>Oxidative phosphorylation | succinate dehydrogenase complex, subunit A, flavoprotein                       |
| <b><i>CxIII</i></b>  | Energy metabolism<br>Oxidative phosphorylation                                                    | ubiquinol-cytochrome c reductase, complex III subunit XI                       |
| <b><i>CxvI</i></b>   | Energy metabolism<br>Oxidative phosphorylation                                                    | cytochrome c oxidase subunit 6b                                                |
| <b><i>Cxv</i></b>    | Energy metabolism<br>Oxidative phosphorylation                                                    | ATP synthase, H <sup>+</sup> transporting, mitochondrial Fo complex, subunit d |
| <b><i>Cycs</i></b>   | Energy metabolism<br>Sulfur metabolism                                                            | cytochrome c, somatic                                                          |

|                         |                                                                                                                                                                     |                                                                                        |
|-------------------------|---------------------------------------------------------------------------------------------------------------------------------------------------------------------|----------------------------------------------------------------------------------------|
| <b><i>Perk</i></b>      | Genetic Information Processing<br>Folding, sorting and degradation                                                                                                  | eukaryotic translation initiation factor 2-alpha kinase 3                              |
| <b><i>Fadd</i></b>      | Signal transduction<br>TNF signaling pathway                                                                                                                        | FAS-associated death domain protein                                                    |
| <b><i>Fas</i></b>       | Signal transduction<br>MAPK ,TNF signaling pathway                                                                                                                  | Fas cell surface death receptor<br>tumor necrosis factor receptor superfamily member 6 |
| <b><i>Appbp1</i></b>    | Ubiquitin-activating enzymes                                                                                                                                        | amyloid beta precursor protein binding protein 1                                       |
| <b><i>Gapdh</i></b>     | Metabolism, Carbon metabolism<br>Biosynthesis of amino acids                                                                                                        | glyceraldehyde-3-phosphate dehydrogenase                                               |
| <b><i>Gq</i></b>        | Signal transduction Rap1 ,Calcium,<br>Sphingolipid,cGMP - PKG signaling pathway                                                                                     | guanine nucleotide binding protein (G protein), q polypeptide                          |
| <b><i>Nmdar</i></b>     | Signal transduction<br>Ras ,Rap1,Calcium,cAMP signaling pathway                                                                                                     | glutamate receptor, ionotropic, N-methyl D-aspartate 1                                 |
| <b><i>Gsk3b</i></b>     | Signal transduction ErbB,Wnt, Hedgehog,<br>Hippo, PI3K-Akt signaling pathway                                                                                        | glycogen synthase kinase 3 beta                                                        |
| <b><i>Ide</i></b>       | Metalloendopeptidase, insulin                                                                                                                                       | insulin-degrading enzyme                                                               |
| <b><i>Il1b</i></b>      | Signal transduction<br>MAPK ,NF-kappa B, TNF signaling pathway                                                                                                      | interleukin 1, beta                                                                    |
| <b><i>Ip3r</i></b>      | Signal transduction Calcium signaling<br>pathway,Phosphatidylinositol signaling system cGMP - PKG signaling pathway                                                 | inositol 1,4,5-trisphosphate receptor, type 1                                          |
| <b><i>Ire1a</i></b>     | Genetic Information Processing<br>Folding, sorting and degradation                                                                                                  | endoplasmic reticulum to nucleus signaling 1                                           |
| <b><i>Lpl</i></b>       | Lipid metabolism Glycerolipid metabolism                                                                                                                            | lipoprotein lipase                                                                     |
| <b><i>Lrp1</i></b>      | lipid metabolism,alpha-2-macroglobulin receptor                                                                                                                     | low density lipoprotein receptor-related protein 1                                     |
| <b><i>ERK/Mapk2</i></b> | Signal transduction Ras,Rap1 , MAPK,<br>ErbB ,TGF-beta VEGF ,TNF ,HIF-1 ,FoxO ,Phospholipase D ,Sphingolipid,<br>cAMP , cGMP - PKG ,PI3K-Akt mTOR signaling pathway | mitogen-activated protein kinase 1                                                     |
| <b><i>Mapt/Tau</i></b>  |                                                                                                                                                                     | microtubule-associated protein tau                                                     |

|                       |                                                                                                   |                                                          |
|-----------------------|---------------------------------------------------------------------------------------------------|----------------------------------------------------------|
| <b><i>Ncstn</i></b>   | Signal transduction<br>MAPK signaling pathway<br>Signal transduction<br>Notch signaling pathway   | nicastrin                                                |
| <b><i>NEP/Mme</i></b> | Immune system,                                                                                    | membrane metallo-endopeptidase, neprilysin               |
| <b><i>Nos1</i></b>    | Amino acid metabolism                                                                             | nitric oxide synthase 1                                  |
| <b><i>Plcb1</i></b>   | Carbohydrate metabolism,Signal transduction                                                       | phospholipase C, beta 1 (phosphoinositide-specific)      |
| <b><i>Psen1</i></b>   | Signal transduction<br>Wnt, Notch,Neurotrophin signaling pathway                                  | presenilin 1                                             |
| <b><i>Pen-2</i></b>   | Signal transduction<br>Notch signaling pathway                                                    | presenilin enhancer gamma secretase subunit              |
| <b><i>Ryr3</i></b>    | Signal transduction Calcium signaling<br>Oxytocin signaling pathway                               | ryanodine receptor 3                                     |
| <b><i>Snca</i></b>    | pre-Synaptic transmission, secondary                                                              | synuclein, alpha (non A4 component of amyloid precursor) |
| <b><i>Tnf</i></b>     | Signal transduction<br>MAPK, TGF-beta, NF-kappa B ,<br>TNF ,Sphingolipid, mTOR, signaling pathway | tumor necrosis factor                                    |

**Table S 2:** Brief description of all the genes and their function involved in Alzheimer disease on set.
